# Supplementary material for: The Circular RNA hsa_circ_0001445 Regulates the Proliferation and Migration of Hepatocellular Carcinoma and May Serve as a Diagnostic Biomarker
Source: Hindawi journal article supplement (doi:10.1155/2018/3073467), 2018-01-01
Supplement: f1 [file 3073467.f1.pdf]

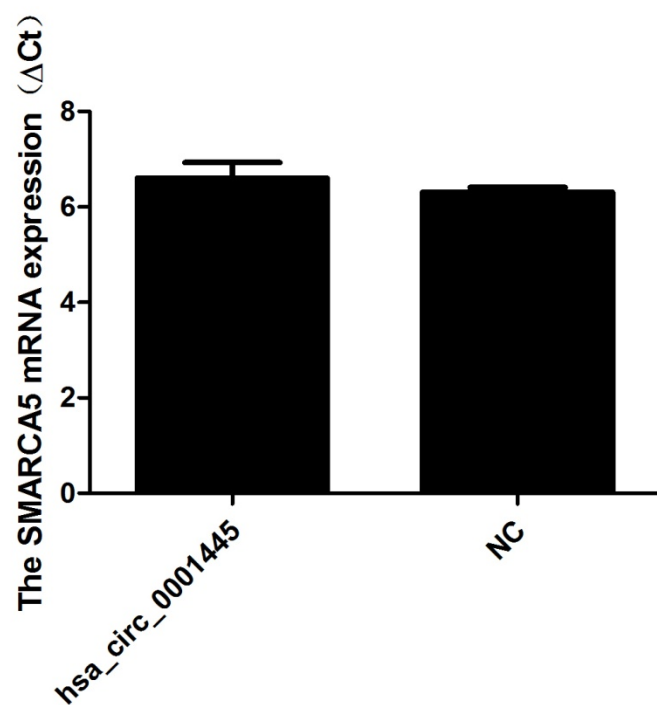

**Supplementary Figure 1:** No significant difference of SMARCA5 mRNA expression was found in hsa\_circ\_0001445 over-expressed HCC cells compared with the negative control cells.
